# Supplementary material
Source: ML conference proceedings conference paper supplement (https://proceedings.neurips.cc/paper_files/paper/2022/hash/dae8afc6b990aa0b3b5efaa096fbd7fa-Abstract.html)
Supplement: Supplementary file 1 [file dae8afc6b990aa0b3b5efaa096fbd7fa-Supplemental-Conference.zip]

Archive with 2 entries (2 files):
- supp.pdf
- code.pdf
